# Supplementary material for: A new sensitizer DVDMS combined with multiple focused ultrasound treatments: an effective antitumor strategy
Source: PubMed Central journal article supplement (PMC4668354; doi:10.1038/srep17485), 2015-12-03
Supplement: srep17485-s1.pdf [file srep17485-s1.pdf]

## Supplementary information (Table 1)

**Title:** A new sensitizer DVDMS combined with multiple focused ultrasound treatments: an effective antitumor strategy

**Authors:** Wenli Xiong<sup>1</sup>

Pan Wang<sup>1</sup>

Jianmin Hu<sup>1</sup>

Yali Jia<sup>1</sup>

Lijie Wu<sup>1</sup>

Xiyang Chen<sup>1</sup>

Quanhong Liu<sup>1</sup>

Xiaobing Wang<sup>1\*</sup>

Table 1. Tumor weight in each group at the 15th day after treatment

| Groups  | Tumor weight (g) | Inhibition rate (%) | P value (compared with Control) |
|---------|------------------|---------------------|---------------------------------|
| Control | 5.41±0.38        |                     |                                 |
| DVDMS   | 4.69±0.25        | 19.71               | p < 0.05                        |
| U-1     | 3.16±0.44        | 32.56               | p < 0.05                        |
| U-2     | 2.73±0.17        | 47.93               | p < 0.01                        |
| U-3     | 2.38±0.06        | 56.12               | p < 0.01                        |
| S-1     | 2.01±0.18        | 59.33               | p < 0.01                        |
| S-2     | 1.58±0.24        | 72.59               | p < 0.01                        |
| S-3     | 0.55±0.22        | 89.82               | p < 0.01                        |
