# Supplementary material for: A new sensitizer DVDMS combined with multiple focused ultrasound treatments: an effective antitumor strategy
Source: PubMed Central journal article supplement (PMC4668354; doi:10.1038/srep17485), 2015-12-03
Supplement: srep17485-s2.pdf [file srep17485-s2.pdf]

## Supplementary information (Table 2)

**Title:** A new sensitizer DVDMS combined with multiple focused ultrasound treatments: an effective antitumor strategy

**Authors:** Wenli Xiong<sup>1</sup>

Pan Wang<sup>1</sup>

Jianmin Hu<sup>1</sup>

Yali Jia<sup>1</sup>

Lijie Wu<sup>1</sup>

Xiyang Chen<sup>1</sup>

Quanhong Liu<sup>1</sup>

Xiaobing Wang<sup>1\*</sup>

Table 2. The Organs weight were measured at the 15th day after treatment

| Groups  | Organs weight (g) |             |             |             |             |
|---------|-------------------|-------------|-------------|-------------|-------------|
|         | Heart             | Liver       | Spleen      | Lung        | Kidney      |
| Control | 0.179±0.024       | 1.566±0.151 | 0.171±0.037 | 0.196±0.017 | 0.346±0.008 |
| DVDMS   | 0.173±0.030       | 1.569±0.119 | 0.169±0.048 | 0.192±0.025 | 0.345±0.032 |
| U-1     | 0.170±0.023       | 1.568±0.192 | 0.173±0.044 | 0.197±0.017 | 0.346±0.026 |
| U-2     | 0.173±0.023       | 1.573±0.152 | 0.171±0.053 | 0.196±0.031 | 0.342±0.031 |
| U-3     | 0.177±0.028       | 1.568±0.069 | 0.170±0.020 | 0.197±0.028 | 0.342±0.015 |
| S-1     | 0.175±0.023       | 1.561±0.191 | 0.171±0.055 | 0.196±0.025 | 0.342±0.011 |
| S-2     | 0.173±0.026       | 1.515±0.129 | 0.162±0.016 | 0.197±0.027 | 0.388±0.014 |
| S-3     | 0.175±0.021       | 1.563±0.074 | 0.171±0.022 | 0.196±0.134 | 0.341±0.013 |
